# Supplementary material for: Effect of Robotic-Assisted Gait at Different Levels of Guidance and Body Weight Support on Lower Limb Joint Kinematics and Coordination
Source: MDPI journal article supplement (doi:10.3390/s23218800), 2023-10-29
Supplement: s1 [file s1]

## Supplementary materials

**Table S1.** Joint angle statistical results. Intervals in the percentage of the gait cycle and in parenthesis of significant differences shown by the statistical parametric mapping procedure between the Treadmill and each Lokomat condition. *Note. n.s.: non-significant.*

|              | Joint angles     |                 |             |                |               |                |                |
|--------------|------------------|-----------------|-------------|----------------|---------------|----------------|----------------|
| Conditions   | Pelvis obliquity | Pelvis rotation | Hip flexion | Hip abduction  | Knee flexion  | Ankle flexion  | Ankle rotation |
| Guid30 BWS30 | 81-89 (0.015)    | 13-36 (<0.001)  | n.s.        | 41-46 (0.039)  | n.s.          | n.s.           | n.s.           |
| Guid30 BWS50 | 6-24 (<0.001)    | 12-47 (<0.001)  | n.s.        | 4-53 (<0.001)  | n.s.          | 51-56 (0.022)  | n.s.           |
| Guid30 BWS70 | 4-24 (0.001)     | 11-48 (<0.001)  | n.s.        | 0-45 (<0.001)  | 72-87 (0.002) | 41-57 (<0.001) | n.s.           |
| Guid50 BWS30 | 4-17 (0.003)     | 11-46 (<0.001)  | n.s.        | 35-52 (0.011)  | n.s.          | n.s.           | n.s.           |
| Guid50 BWS50 | 6-22 (0.004)     | 12-49 (<0.001)  | n.s.        | 4-45 (<0.001)  | n.s.          | 48-56 (0.007)  | 57-64 (0.02)   |
| Guid50 BWS70 | 4-25 (0.005)     | 11-48 (<0.001)  | n.s.        | 1-53 (<0.001)  | 73-88 (0.002) | 39-57 (<0.001) | 53-61 (0.011)  |
| Guid70 BWS30 | 11-20 (0.014)    | 18-48 (<0.001)  | n.s.        | 33-50 (0.004)  | n.s.          | n.s.           | n.s.           |
| Guid70 BWS50 | 10-22 (0.011)    | 15-49 (<0.001)  | n.s.        | 11-53 (<0.001) | n.s.          | n.s.           | 57-63 (0.032)  |
| Guid70 BWS70 | 4-48 (<0.001)    | 12-49 (<0.001)  | n.s.        | 1-52 (<0.001)  | n.s.          | 39-57 (<0.001) | 53-63 (0.006)  |

**Table S2.** Angular velocity statistical results. Intervals in the percentage of the gait cycle and in parenthesis of significant differences shown by the statistical parametric mapping procedure between the Treadmill and each Lokomat condition. *Note. n.s.: non-significant*

|              | Joint angular velocity          |                                 |                |                                 |                |                                                    |                |
|--------------|---------------------------------|---------------------------------|----------------|---------------------------------|----------------|----------------------------------------------------|----------------|
| Conditions   | Pelvis obliquity                | Pelvis rotation                 | Hip flexion    | Hip abduction                   | Knee flexion   | Ankle flexion                                      | Ankle rotation |
| Guid30 BWS30 | 65-71 (<0.001)                  | n.s.                            | 62-68 (<0.001) | n.s.                            | 55-64 (<0.001) | 70-79 (<0.001)                                     | n.s.           |
| Guid30 BWS50 | 2-10 (<0.001)<br>66-79 (<0.001) | n.s.                            | 60-69 (<0.001) | 3-11 (<0.001)<br>66-83 (<0.001) | 54-72 (<0.001) | 14-20 (<0.001)<br>38-52 (<0.001)<br>69-80 (<0.001) | n.s.           |
| Guid30 BWS70 | 0-7 (<0.001)<br>66-79 (<0.001)  | n.s.                            | 60-82 (<0.001) | 0-7 (<0.001)<br>66-83 (<0.001)  | 54-75 (<0.001) | 14-24 (<0.001)<br>35-48 (<0.001)<br>70-78 (<0.001) | n.s.           |
| Guid50 BWS30 | 65-77 (<0.001)                  | 88-100 (<0.001)                 | n.s.           | n.s.                            | 53-64 (<0.001) | 69-80 (<0.001)                                     | n.s.           |
| Guid50 BWS50 | 71-77 (<0.001)                  | 86-95 (<0.001)                  | 60-66 (<0.001) | 72-82 (<0.001)                  | 55-66 (<0.001) | 41-48 (<0.001)<br>68-80 (<0.001)                   | n.s.           |
| Guid50 BWS70 | 0-10 (<0.001)<br>66-81 (<0.001) | 8-13 (<0.001)                   | 76-87 (<0.001) | 2-12 (<0.001)<br>66-81 (<0.001) | 54-76 (<0.001) | 7-28 (<0.001)<br>31-48 (<0.001)<br>69-80 (<0.001)  | 35-41 (<0.001) |
| Guid70 BWS30 | 65-76 (<0.001)                  | 91-100 (<0.001)                 | n.s.           | 71-84 (<0.001)                  | 53-65 (<0.001) | 39-53 (<0.001)<br>70-79 (<0.001)                   | 6-11 (<0.001)  |
| Guid70 BWS50 | n.s.                            | 86-95 (<0.001)                  | n.s.           | 2-8 (0.001)<br>72-84 (<0.001)   | 54-65 (<0.001) | 16-24 (<0.001)<br>34-42 (<0.001)<br>69-80 (<0.001) | n.s.           |
| Guid70 BWS70 | 0-11 (<0.001)<br>67-78 (<0.001) | 8-13 (<0.001)<br>18-23 (<0.001) | 79-89 (<0.001) | 1-12 (<0.001)<br>66-82 (<0.001) | 54-73 (<0.001) | 8-29 (<0.001)<br>31-47 (<0.001)<br>70-79 (<0.001)  | n.s.           |

**Table S3.** Inter-joint coordination statistical results. Intervals in the percentage of the gait cycle and in parenthesis of significant differences shown by the SPM procedure between the Treadmill and each Lokomat condition. *Note. n.s.: non-significant*

|              | Continuous relative phase       |                 |                                                  |
|--------------|---------------------------------|-----------------|--------------------------------------------------|
| Conditions   | Hip-Knee                        | Hip-Ankle       | Knee-Ankle                                       |
| Guid30 BWS30 | n.s.                            | n.s.            | n.s.                                             |
| Guid30 BWS50 | 28-90 (<0.001)                  | 58-100 (<0.001) | 65-71 (0.036)<br>77-86 (0.024)<br>90-100 (0.021) |
| Guid30 BWS70 | 25-92 (<0.001)                  | 68-100 (<0.001) | n.s.                                             |
| Guid50 BWS30 | 70-82 (0.006)                   | n.s.            | n.s.                                             |
| Guid50 BWS50 | 0-89 (<0.001)                   | 61-89 (0.001)   | n.s.                                             |
| Guid50 BWS70 | 18-93 (<0.001)                  | 20-100 (<0.001) | n.s.                                             |
| Guid70 BWS30 | n.s.                            | n.s.            | n.s.                                             |
| Guid70 BWS50 | 27-35 (0.027)<br>47-80 (<0.001) | 55-100 (<0.001) | n.s.                                             |
| Guid70 BWS70 | 20-91 (<0.001)                  | 35-91 (<0.001)  | n.s.                                             |
